# Supplementary material for: An accurate prediction model to identify undiagnosed at-risk patients with COPD: a cross-sectional case-finding study
Source: PubMed Central journal article supplement (PMC6538645; doi:10.1038/s41533-019-0135-9), 2019-05-28
Supplement: 41533_2019_135_MOESM1_ESM.pdf [file 41533_2019_135_MOESM1_ESM.pdf]

## SUPPLEMENTARY INFORMATION

### An accurate prediction model to identify undiagnosed at-risk patients with COPD: a cross-sectional case-finding study

**Supplementary Figure 1** Study flow in the development (a) and validation (b) cohorts. An abnormal CXR includes overt bronchiectasis (n= 11 and 4), interstitial lung disease (n= 8 and 3), pleural effusion (n= 6 and 2), lobar infiltration (n= 4 and 2), lung mass (n= 3 and 1), or mediastinal lesions (n= 2 and 0) in the development and validation cohorts, respectively. *CXR* chest X-ray, *CAT* COPD assessment test, *COPD* chronic obstructive pulmonary disease

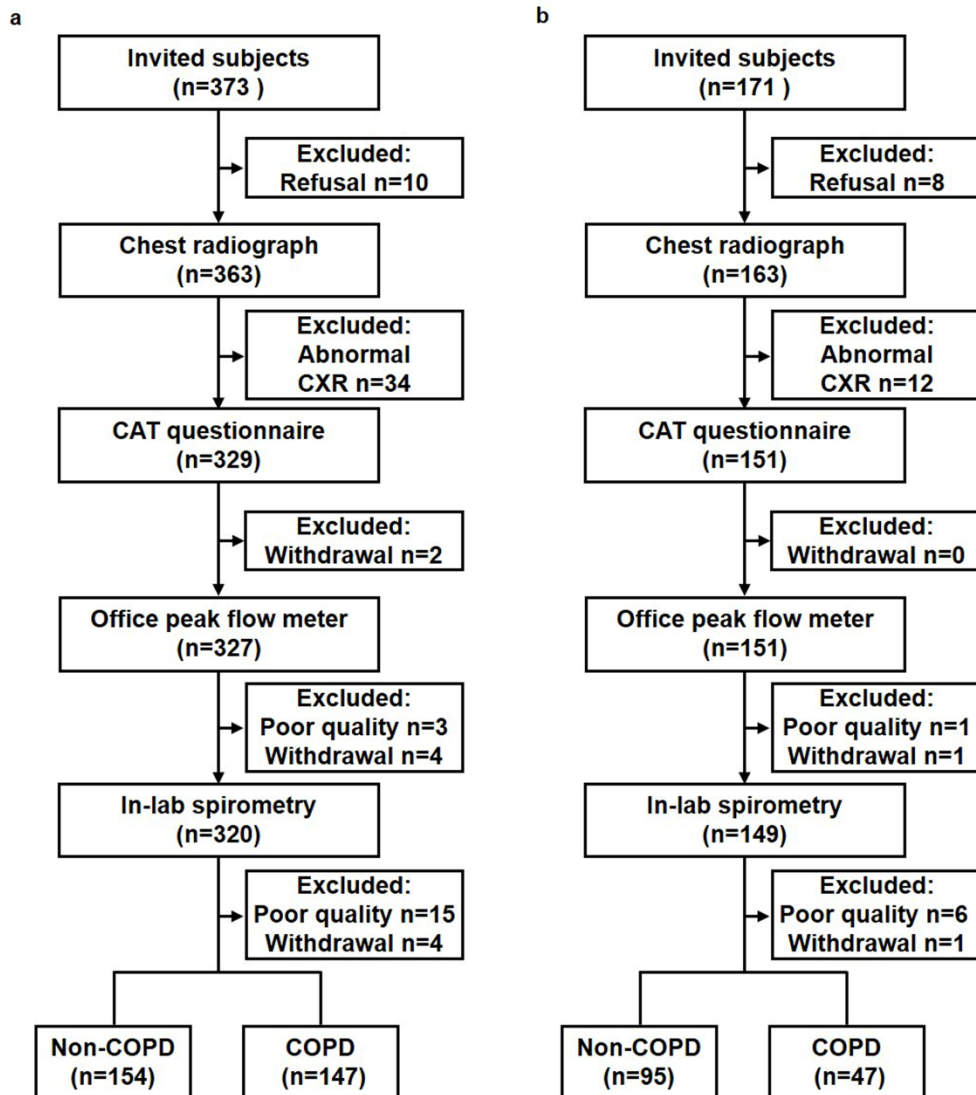

**Supplementary Figure 2** Sensitivity analysis for the influence of dropping different variables from the prediction model ( $P_{COPD}$ ) on the diagnostic accuracy of COPD represented by the area under the receiver operating characteristic curve (AUROC) in the development cohort.  $P_{COPD}$  probability of COPD,  $CI$  confidence interval

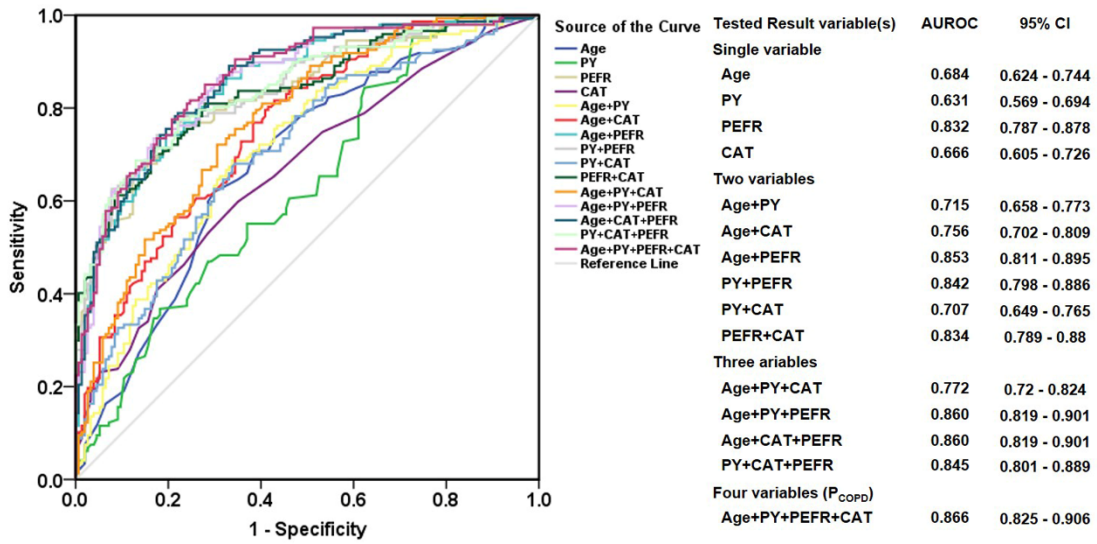

**Supplementary Figure 3** Sample size estimation for the validation cohort. Given a type I error of 0.05, a type II error of 0.1 (equal to a power of 0.9), the null hypothesis value of 0.5, the ratio of subjects with versus without COPD of 3, the required minimal sample size is at least 116 (calculated using the MedCalc software).

**Type I and II error**

Type I error (Alpha, Significance): 0.05

Type II error (Beta, 1-Power): 0.10

**Input**

Area under ROC curve: 0.7

Null Hypothesis value: 0.5

Ratio of sample sizes in negative / positive groups: 3

**Results**

Number of positive cases required: 29

Number of negative cases required: 87

Total sample size (both groups together): 116

|                      |      | Type I Error - Alpha |          |                |          |
|----------------------|------|----------------------|----------|----------------|----------|
|                      |      | 0.20                 | 0.10     | 0.05           | 0.01     |
| Type II Error - Beta | 0.20 | 13 + 39              | 17 + 51  | 22 + 66        | 32 + 96  |
|                      | 0.10 | 18 + 54              | 23 + 69  | <b>29 + 87</b> | 41 + 123 |
|                      | 0.05 | 23 + 69              | 29 + 87  | 35 + 105       | 48 + 144 |
|                      | 0.01 | 35 + 105             | 42 + 126 | 49 + 147       | 65 + 195 |

Buttons: Calculate, Exit

**Supplementary Table 1.** Characteristics of the study subjects categorized by spirometry-confirmed COPD in the validation cohort

|                            | All       | Total subjects |           | <i>P</i> <sup>a</sup> | COPD patients divided by GOLD stage |                          |                           | <i>P</i> <sup>b</sup> |
|----------------------------|-----------|----------------|-----------|-----------------------|-------------------------------------|--------------------------|---------------------------|-----------------------|
|                            |           | COPD           | Non-COPD  |                       | GOLD I                              | GOLD II                  | GOLD III-IV               |                       |
| Numbers                    | 142       | 47             | 95        |                       | 26                                  | 18                       | 3                         |                       |
| Age, years                 | 65.2±11.4 | 71.1±11.7      | 62.3±10.1 | <0.001                | 73.5±11.7 <sup>d</sup>              | 68.3±11.7                | 67±9.8                    | <0.001                |
| Gender, male (%)           | 140 (99)  | 47 (100)       | 93 (98)   | 0.446 <sup>c</sup>    | 26 (100)                            | 18 (100)                 | 3 (100)                   | 0.800 <sup>c</sup>    |
| Current smoker (%)         | 53 (37)   | 17 (36)        | 36 (38)   | 0.842 <sup>c</sup>    | 9 (35)                              | 8 (44)                   | 0 (0)                     | 0.518 <sup>c</sup>    |
| Smoking pack-years         | 43.1±20.3 | 46.1±20.2      | 41.6±20.3 | 0.215                 | 43.0±17.4                           | 44.2±19.1                | 84.5±9.3 <sup>d,e,f</sup> | 0.004                 |
| Peak flow meter            |           |                |           |                       |                                     |                          |                           |                       |
| Best PEFR, L/min           | 466±128   | 366±134        | 516±92    | <0.001                | 384±144 <sup>d</sup>                | 358±118 <sup>d</sup>     | 253±101 <sup>d</sup>      | <0.001                |
| PEFR, % pred.              | 92±22     | 75±25          | 100±14    | <0.001                | 80±25 <sup>d</sup>                  | 72±23 <sup>d</sup>       | 52±18 <sup>d</sup>        | <0.001                |
| CAT score                  |           |                |           |                       |                                     |                          |                           |                       |
| Total                      | 5.0±4.2   | 6.4±4.6        | 4.3±3.8   | 0.004                 | 4.4±3.5                             | 8.3±4.4 <sup>d,e</sup>   | 12.7±5.5 <sup>d,e</sup>   | <0.001                |
| Cough                      | 1.4±1.2   | 1.5±1.2        | 1.3±1.2   | 0.239                 | 1.0±1.1                             | 2.3±1.1 <sup>d,e</sup>   | 1.7±0.6                   | 0.002                 |
| Phlegm                     | 1.3±1.1   | 1.6±1.1        | 1.2±1.1   | 0.015                 | 1.4±1.2                             | 1.9±1.0 <sup>d</sup>     | 1.7±0.6                   | 0.033                 |
| Chest tightness            | 0.7±0.9   | 0.9±1          | 0.5±0.9   | 0.040                 | 0.6±0.8                             | 1.0±0.9                  | 2.3±1.5 <sup>d,e</sup>    | 0.002                 |
| Breathlessness             | 0.8±1.1   | 1.3±1.3        | 0.5±0.9   | <0.001                | 0.7±1.0                             | 1.8±1.2 <sup>d,e</sup>   | 3.3±0.6 <sup>d,e</sup>    | <0.001                |
| Activity limitation        | 0.1±0.4   | 0.3±0.6        | 0.1±0.3   | 0.002                 | 0.2±0.5                             | 0.2±0.5                  | 1.3±0.6 <sup>d,e,f</sup>  | <0.001                |
| Confidence                 | 0.1±0.2   | 0.1±0.3        | 0.1±0.2   | 0.126                 | 0.1±0.2                             | 0.1±0.2                  | 0.7±0.6 <sup>d,e,f</sup>  | <0.001                |
| Sleep                      | 0.3±0.8   | 0.2±0.7        | 0.4±0.8   | 0.336                 | 0.1±0.3                             | 0.4±1                    | 0.3±0.6                   | 0.443                 |
| Energy                     | 0.5±0.9   | 0.5±0.9        | 0.4±0.9   | 0.428                 | 0.4±0.8                             | 0.6±0.8 <sup>d</sup>     | 1.3±1.5 <sup>d</sup>      | 0.298                 |
| Spirometry, pre-BD         |           |                |           |                       |                                     |                          |                           |                       |
| FEV <sub>1</sub> , liter   | 2.56±0.78 | 1.95±0.67      | 2.86±0.64 | <0.001                | 2.23±0.65 <sup>d</sup>              | 1.71±0.47 <sup>d,e</sup> | 0.95±0.37 <sup>d,e</sup>  | <0.001                |
| FEV <sub>1</sub> , % pred. | 96±20     | 80±21          | 103±15    | <0.001                | 95±11 <sup>d</sup>                  | 66±11 <sup>d,e</sup>     | 39±12 <sup>d,e,f</sup>    | <0.001                |
| FVC, liter                 | 3.32±0.90 | 2.92±0.88      | 3.52±0.84 | <0.001                | 3.23±0.92                           | 2.63±0.61 <sup>d</sup>   | 1.90±0.59 <sup>d</sup>    | <0.001                |
| FVC, % pred.               | 91±17     | 85±19          | 95±16     | 0.001                 | 96±15                               | 73±11 <sup>d,e</sup>     | 57±15 <sup>d,e</sup>      | <0.001                |
| FEV <sub>1</sub> /FVC (%)  | 77±10     | 66±8           | 82±6      | <0.001                | 69±4 <sup>d</sup>                   | 65±8 <sup>d</sup>        | 50±16 <sup>d,e,f</sup>    | <0.001                |
| Spirometry, post-BD        |           |                |           |                       |                                     |                          |                           |                       |
| FEV <sub>1</sub> , liter   | 3.42±9.8  | 2.02±0.67      | 2.91±0.64 | <0.001                | 2.30±0.67 <sup>d</sup>              | 1.80±0.44 <sup>d</sup>   | 0.98±0.31 <sup>d,e</sup>  | <0.001                |
| FEV <sub>1</sub> , % pred. | 77±10     | 66±8           | 82±6      | <0.001                | 69±4                                | 65±8 <sup>d,e</sup>      | 50±16 <sup>d,e,f</sup>    | <0.001                |
| FVC, liter                 | 3.41±0.86 | 3.08±0.87      | 3.57±0.81 | 0.001                 | 3.39±0.94                           | 2.80±0.54 <sup>d</sup>   | 2.01±0.47 <sup>d,e</sup>  | <0.001                |
| FVC, % pred.               | 94±16     | 90±19          | 96±15     | 0.030                 | 101±15                              | 78±10 <sup>d,e</sup>     | 61±12 <sup>d,e</sup>      | <0.001                |
| FEV <sub>1</sub> /FVC (%)  | 76±10     | 65±7           | 82±5      | <0.001                | 68±3 <sup>d</sup>                   | 63±7 <sup>d</sup>        | 50±16 <sup>d,e,f</sup>    | <0.001                |

Data are presented as means ± standard deviation

% *pred.* percent predicted value, *BD* bronchodilation, *CAT* COPD assessment test, *COPD* chronic obstructive pulmonary disease, *FEV<sub>1</sub>* forced expiratory volume in the first second, *FVC* forced expiratory capacity, *PEFR* peak expiratory flow rate

<sup>a</sup>Independent t-test, COPD vs. non-COPD

<sup>b</sup>One-way ANOVA test, compare 4 groups: non-COPD, GOLD I, GOLD II, and GOLD III-IV

<sup>c</sup>Chi-square test

<sup>d</sup>Post-hoc Bonferroni test, *P* < 0.05, vs. non-COPD

<sup>e</sup>Post-hoc Bonferroni test, *P* < 0.05, vs. GOLD I

<sup>f</sup>Post-hoc Bonferroni test, *P* < 0.05, vs. GOLD II

**Supplementary Table 2.** Characteristics of misdiagnosed (false-negative) cases of COPD categorized by different modalities in the development cohort

|                            | COPD cases with   |                  |               |               |
|----------------------------|-------------------|------------------|---------------|---------------|
|                            | $P_{COPD} < 0.44$ | $PEFR \geq 79\%$ | $CAT < 7$     | $CAT < 10$    |
| Numbers (% of total COPD)  | 33 (22.4)         | 35 (23.8)        | 59 (40.1)     | 87 (59.2)     |
| Age, years                 | 72.5 ± 112.2      | 75.9 ± 9.4       | 76.7 ± 9.3    | 75.8 ± 10.3   |
| Smoking pack-years         | 44.2 ± 18.5       | 49.4 ± 9.4       | 51.9 ± 28.5   | 51.8 ± 27.7   |
| Peak flow meter            |                   |                  |               |               |
| Best PEFR, L/min           | 443.3 ± 75.6      | 442.8 ± 72.6     | 340.5 ± 120.4 | 328.4 ± 112.3 |
| PEFR, % pred.              | 97.0 ± 14.0       | 98.0 ± 12.0      | 72.5 ± 26.8   | 70.2 ± 25.0   |
| Total CAT scores           | 6.3 ± 5.5         | 6.4 ± 5.4        | 3.6 ± 1.6     | 5.0 ± 2.5     |
| Spirometry, pre-           |                   |                  |               |               |
| FEV <sub>1</sub> , liter   | 2.00 ± 0.49       | 1.99 ± 0.47      | 1.64 ± 0.53   | 1.63 ± 0.51   |
| FEV <sub>1</sub> , % pred. | 85.9 ± 15.2       | 88.7 ± 15.0      | 74.6 ± 20.3   | 72.8 ± 19.7   |
| FVC, liter                 | 3.01 ± 0.78       | 2.98 ± 0.74      | 2.74 ± 0.70   | 2.74 ± 0.73   |
| FVC, % pred.               | 90.8 ± 17.8       | 92.1 ± 18.0      | 85.9 ± 17.4   | 84.9 ± 17.3   |
| FEV <sub>1</sub> /FVC (%)  | 66.5 ± 5.3        | 66.7 ± 5.7       | 59.8 ± 11.1   | 59.4 ± 11.4   |
| Spirometry, post-BD        |                   |                  |               |               |
| FEV <sub>1</sub> , liter   | 2.10 ± 0.54       | 2.08 ± 0.51      | 1.73 ± 0.55   | 1.71 ± 0.53   |
| FEV <sub>1</sub> , % pred. | 90.2 ± 17.7       | 93.2 ± 16.5      | 79.0 ± 21.1   | 76.9 ± 20.6   |
| FVC, liter                 | 3.21 ± 0.82       | 3.19 ± 0.74      | 2.95 ± 0.71   | 2.93 ± 0.74   |
| FVC, % pred.               | 97.0 ± 18.9       | 98.8 ± 18.3      | 92.4 ± 18.1   | 90.8 ± 18.1   |
| FEV <sub>1</sub> /FVC (%)  | 65.1 ± 3.3        | 65.1 ± 3.9       | 58.6 ± 9.7    | 58.4 ± 10.0   |

Data are presented as means ± standard deviation

% *pred.* percent predicted value, *BD* bronchodilation, *CAT* COPD assessment test, *COPD* chronic obstructive pulmonary disease, *FEV<sub>1</sub>* forced expiratory volume in the first second, *FVC* forced expiratory capacity, *PEFR* peak expiratory flow rate
